# Supplementary material for: Achieving dynamic stability of single-crystal low-Co Ni-rich cathode material for high performance lithium batteries
Source: Royal Society of Chemistry journal article supplement (doi:10.1039/d4ta04698f), 2024-01-01
Supplement: d4ta04698f1.pdf [file d4ta04698f1.pdf]

## **Supporting information**

# **Achieving Dynamic Stability of Single-Crystal Low-Co Ni-Rich Cathode Material for High performance Lithium Batteries**

Adil Saleem,<sup>a</sup> Leon L. Shaw,<sup>a\*</sup> Mehwish Khalid Butt,<sup>b</sup> Javed Rehman,<sup>b</sup> Arshad Hussain,<sup>c</sup> Zawar Hussain,<sup>d</sup> Rashid Iqbal,<sup>e\*</sup> Muhammad Kashif Majeed,<sup>f\*</sup>

<sup>a</sup>*Department of Mechanical, Materials and Aerospace Engineering, Illinois Institute of Technology, Chicago, IL, United States.*

<sup>b</sup>*State Key Laboratory of Metastable Materials Science and Technology, and School of Materials Science and Engineering, Yanshan University, Qinhuangdao 066004, China.*

<sup>c</sup>*Interdisciplinary Research Center for Hydrogen and Energy Storage, King Fahd University of Petroleum & Minerals, Dhahran 31261, Saudia Arabia.*

<sup>d</sup>*Institute for Advanced Study, Shenzhen University, Shenzhen 518060, China.*

<sup>e</sup>*Key Laboratory of Colloid and Interface Chemistry of the Ministry of Education, School of Chemistry and Chemical Engineering, Shandong University, 250100 Jinan, China.*

<sup>f</sup>*Department of Mechanical Engineering, The University of Texas at Dallas, Richardson, TX, United States.*

### **\*Corresponding author:**

\*Leon L. Shaw (Email: [lshaw2@iit.edu](mailto:lshaw2@iit.edu))

\*Rashid Iqbal (Email: [rashid@szu.com](mailto:rashid@szu.com))

\*Muhammad Kashif Majeed (Email: [drmkm@utdallas.edu](mailto:drmkm@utdallas.edu))

**Table S1:** Rietveld XRD refinement results of the pristine cathode materials.

| Electrode material | <i>a</i> (Å) | <i>c</i> (Å) | Rp (%) | Rwp (%) | Rexp (%) | Li/Ni cation mixing (%) |
|--------------------|--------------|--------------|--------|---------|----------|-------------------------|
| Fresh-NMC          | 2.878        | 14.241       | 5.03   | 8.56    | 3.08     | 3.28                    |
| Fresh-NMFAC        | 2.865        | 14.289       | 4.99   | 7.89    | 3.36     | 2.96                    |

**Table S2:** Metal-oxygen bond lengths for NMC and NMFAC obtained from the DFT calculation of this study.

| NMC   |       | NMFAC |       |
|-------|-------|-------|-------|
| Bonds | a (Å) | b (Å) | c (Å) |
| Ni-O  | -     | Ni-O  | 1.980 |
| Li-O  | -     | Li-O  | 2.016 |
| Mn-O  | 1.986 | Fe-O  | 2.012 |
| Co-O  | 1.967 | Al-O  | 1.95  |

**Table S3.** Chemical compositions of Ni, Mn, Fe, Al, and Co for NMC and NMFAC measured via the ICP-AES test.

| Sample | Chemical composition (at. %) |      |      |      |      |
|--------|------------------------------|------|------|------|------|
| NMC    | Ni                           | Mn   | Co   | -    | -    |
|        | 90.02                        | 4.97 | 5.01 | -    | -    |
| NMFAC  | Ni                           | Mn   | Fe   | Al   | Co   |
|        | 90.01                        | 5.02 | 2.04 | 1.95 | 0.98 |

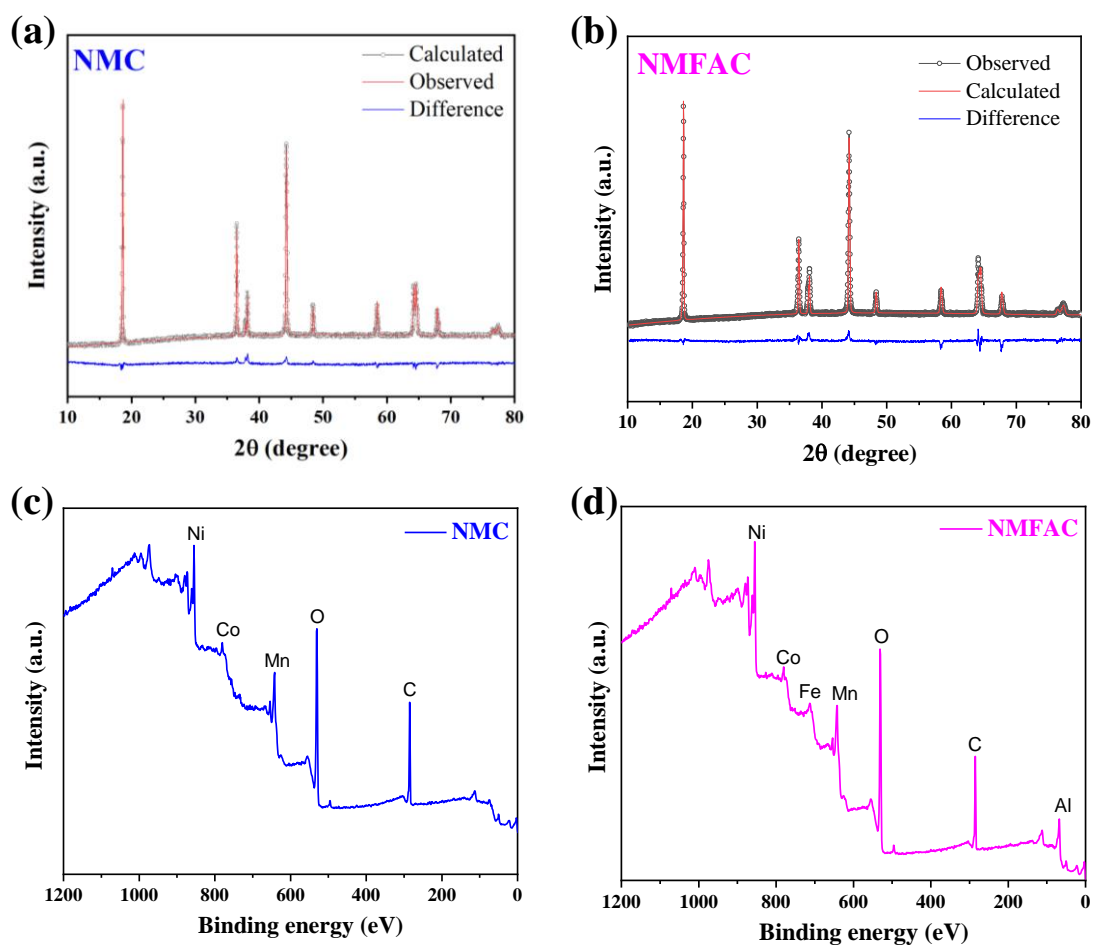

**Figure S1:** (a, b) Rietveld refinement results of the XRD patterns, and (c, d) XPS survey spectrum for NMC and NMFAC, respectively.

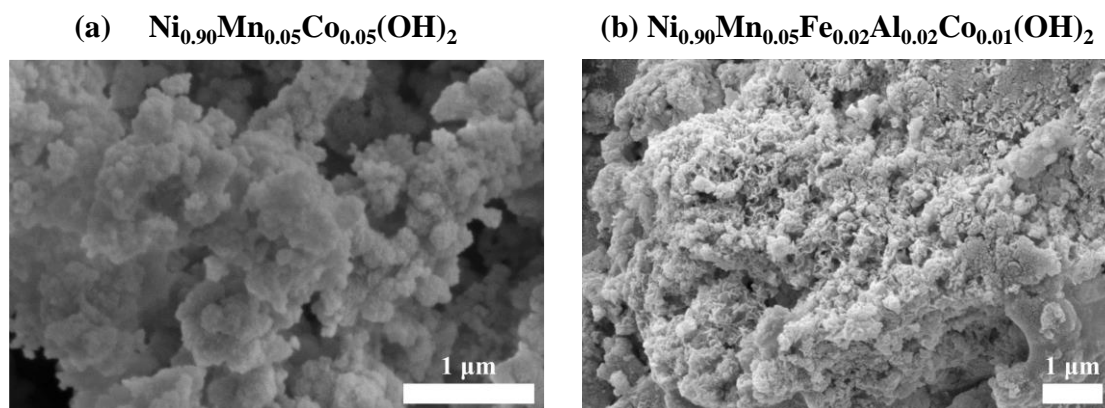

**Figure S2:** SEM images of (a)  $\text{Ni}_{0.90}\text{Mn}_{0.05}\text{Co}_{0.05}(\text{OH})_2$  and (b)  $\text{Ni}_{0.90}\text{Mn}_{0.05}\text{Fe}_{0.02}\text{Al}_{0.02}\text{Co}_{0.01}(\text{OH})_2$  precursors.

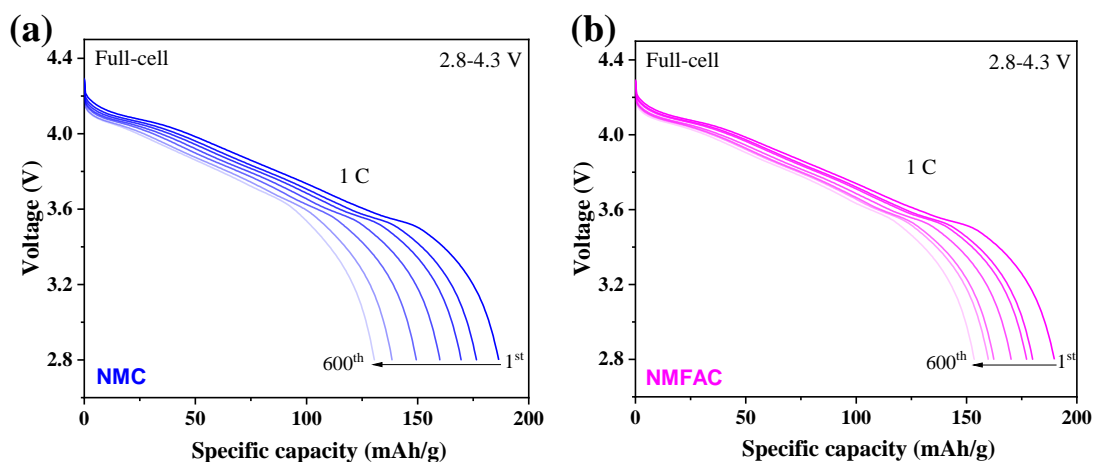

**Figure S3:** Discharge voltage profiles of (a) NMC and (b) NMFAC full cells with a graphite anode at 2.8 - 4.3 V.

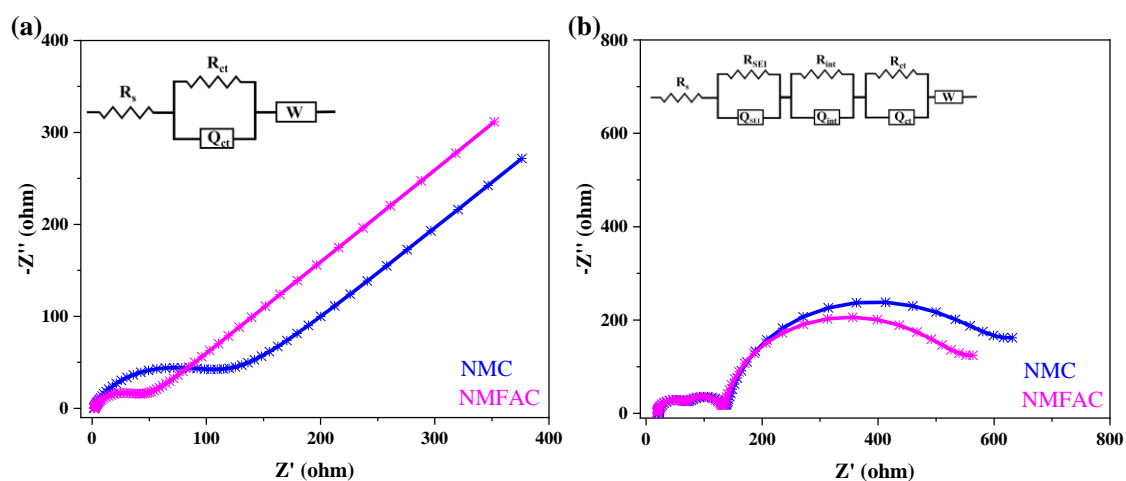

**Figure S4:** Nyquist plots of (a) before and (b) after 100 cycles for NMC and NMFAC cathode materials.

**Table S4.** EIS data before and after 100 cycles for NMC and NMFAC cathode materials.

| Cathode |                  | $R_s(\Omega)$ | $R_{SEI}(\Omega)$ | $R_{int}(\Omega)$ | $R_{ct}(\Omega)$ |
|---------|------------------|---------------|-------------------|-------------------|------------------|
| NMC     | Before cycle     | 1.69          | -                 | -                 | 109              |
|         | After 100 cycles | 2.15          | 5.05              | 129               | 495              |
| NMFAC   | Before cycle     | 1.75          | -                 | -                 | 42               |
|         | After 100 cycles | 1.93          | 4.80              | 126               | 431              |

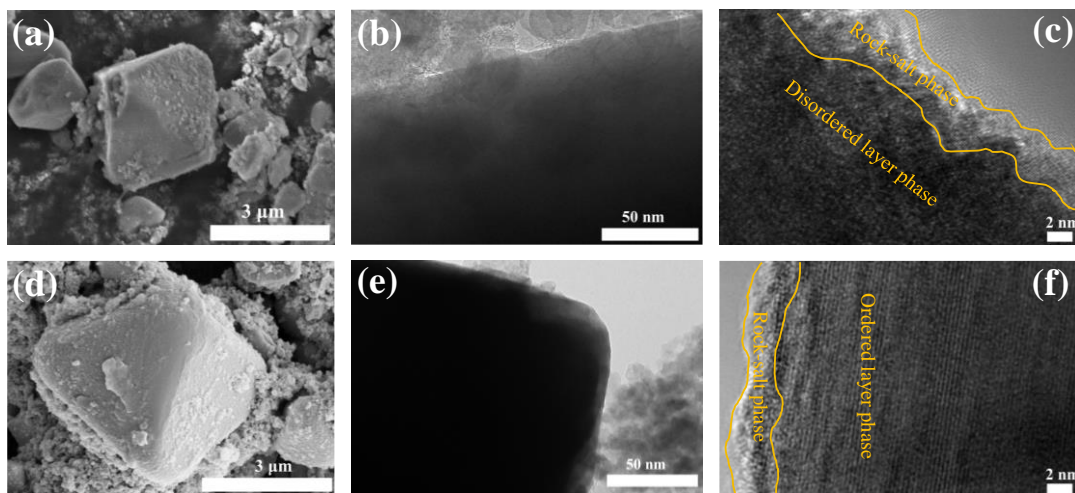

**Figure S5:** SEM and TEM images of (a-c) NMC and (d-f) NMFAC after 600 cycles.

**Table S5:** Electrochemical performance comparison of NMC and NMFAC with half-cell and full cell (our work).

| Cathode | Cycling Stability                                 |              |               |                               |          |               |
|---------|---------------------------------------------------|--------------|---------------|-------------------------------|----------|---------------|
|         | Initial Discharge capacity [mAh g <sup>-1</sup> ] | Voltage      | No. of Cycles | Loading (mg/cm <sup>2</sup> ) | Rate (C) | Retention (%) |
| NMC     | 196                                               | 4.3 V vs. Li | 100           | ~2.25                         | 1C       | 90            |
| NMFAC   | 198                                               | 4.3 V vs. Li | 100           | ~2.25                         | 1C       | 93            |
| NMC     | 186                                               | 4.3 V vs. Gr | 600           | ~2.22                         | 1C       | 70            |
| NMFAC   | 189                                               | 4.3 V vs. Gr | 600           | ~2.22                         | 1C       | 81            |

**Table S6:** Comparison of the specific capacity and cycling performance of SC NMC and NMFAC cathodes with the previously reported Ni-rich cathodes.

| Cathode                                                                                                                  | Cycling Stability                                 |                  |               |                               |               |               | Ref. |
|--------------------------------------------------------------------------------------------------------------------------|---------------------------------------------------|------------------|---------------|-------------------------------|---------------|---------------|------|
|                                                                                                                          | Initial Discharge capacity [mAh g <sup>-1</sup> ] | Voltage          | No. of Cycles | Loading (mg/cm <sup>2</sup> ) | Rate (C)      | Retention (%) |      |
| SCNMC811                                                                                                                 | 185                                               | 4.3 V vs. Li     | 25            | 3                             | 0.1C          | ~50%          | [1]  |
| SCNMC83                                                                                                                  | 184                                               | 4.2 V vs.        | 600           | 47                            | 1C            | 84%           | [2]  |
|                                                                                                                          |                                                   | Gr/SiO           |               |                               |               |               |      |
| LiNi <sub>0.89</sub> Mn <sub>0.055</sub> -<br>Co <sub>0.055</sub> O <sub>2</sub>                                         | 226                                               | 4.4 V vs. Li     | 100           | -                             | 0.1C          | 91%           | [3]  |
| LiNi <sub>0.883</sub> Mn <sub>0.056</sub> -<br>Al <sub>0.061</sub> O <sub>2</sub>                                        | 216                                               | 4.4 V vs. Li     | 100           | 2.5                           | 1/3C          | 90%           | [3]  |
| LiNi <sub>0.89</sub> Mn <sub>0.044</sub> Co <sub>0.042</sub> -<br>Al <sub>0.013</sub> Mg <sub>0.011</sub> O <sub>2</sub> | 213                                               | 4.4 V vs. Li     | 100           | 2.5                           | 1/3C          | 93%           | [3]  |
| LiNi <sub>0.883</sub> Co <sub>0.053</sub> -<br>Al <sub>0.064</sub> O <sub>2</sub>                                        | 220                                               | 4.4 V vs. Li     | 100           | 2.5                           | 1/3C          | 88%           | [3]  |
| LiNi <sub>x</sub> Fe <sub>y</sub> Al <sub>z</sub> O <sub>2</sub>                                                         | 180                                               | 4.5 V vs. Li     | 100           | 5                             | 0.3C          | ~70%          | [4]  |
| LiNi <sub>0.95</sub> Mg <sub>0.05</sub> O <sub>2</sub>                                                                   | 200                                               | 4.3 V vs. Li     | 100           | 10-12                         | 0.05/<br>0.2C | ~90%          | [5]  |
| LiNi <sub>0.95</sub> Al <sub>0.05</sub> O <sub>2</sub>                                                                   | 220                                               | 4.3 V vs. Li     | 100           | 10-12                         | 0.05/<br>0.2C | ~86%          | [5]  |
| LiNi <sub>0.93</sub> Al <sub>0.05</sub> Ti <sub>0.01</sub> -<br>Mg <sub>0.01</sub> O <sub>2</sub>                        | 221                                               | 4.25 V vs.<br>Gr | 800           | 2.0                           | 0.5C          | 52%           | [6]  |
| LiNi <sub>0.96</sub> Mg <sub>0.02</sub> Ti <sub>0.02</sub> O <sub>2</sub>                                                | 180                                               | 4.4 V vs. Gr     | 300           | 1.4                           | 1C            | 85%           | [7]  |
| LiNi <sub>0.8</sub> Co <sub>0.1</sub> Mn <sub>0.09</sub> -<br>Cu <sub>0.01</sub> O <sub>2</sub>                          | 175                                               | 4.3 V vs. Li     | 100           | -                             | 0.5C          | 94%           | [8]  |
| NMC                                                                                                                      | 196                                               | 4.3 V vs. Li     | 100           | ~2.25                         | 1C            | 90            | Our  |
| NMFAC                                                                                                                    | 198                                               | 4.3 V vs. Li     | 100           | ~2.25                         | 1C            | 93            | Work |

**Table S7:** Comparison of the previously reported co-doped Ni-rich cathodes with our work.

| Cathode                                                                                                               | Doping elements | Synthesis technique        | Initial charge capacity [mAh g <sup>-1</sup> ] | Rate (C) | Ref.            |
|-----------------------------------------------------------------------------------------------------------------------|-----------------|----------------------------|------------------------------------------------|----------|-----------------|
| <b>LiNi<sub>0.905</sub>Co<sub>0.04</sub>Mn<sub>0.04</sub>-<br/>Al<sub>0.005</sub>Nb<sub>0.01</sub>O<sub>2</sub></b>   | Al/Nb           | Co-<br>precipitation       | 230                                            | 0.1      | [9]             |
| <b>LiNi<sub>0.890</sub>Mn<sub>0.044</sub>Co<sub>0.042</sub>Al<sub>0.013</sub><br/>Mg<sub>0.011</sub>O<sub>2</sub></b> | Al/Mg           | Co-<br>precipitation       | 213                                            | 0.1      | [3]             |
| <b>LiNi<sub>0.598</sub>Co<sub>0.08</sub>Mn<sub>0.3</sub>Zr<sub>0.002</sub>-<br/>Ti<sub>0.002</sub>O<sub>2</sub></b>   | Zr/Ti           | Co-<br>precipitation       | ~180                                           | 0.3      | [10]            |
| <b>SC-NMC</b>                                                                                                         | Ce/Gd           | Solid State                | 211                                            | 0.1      | [11]            |
| <b>LiNiO<sub>2</sub></b>                                                                                              | Mg/Al           | Interdiffusion<br>strategy | 252                                            | 0.1      | [12]            |
| <b>NMFAC</b>                                                                                                          | Fe/Al           | Co-<br>precipitation       | 248                                            | 0.2      | <b>Our Work</b> |

## References

- [1] J. Zhu, G. Chen, Single-crystal based studies for correlating the properties and high-voltage performance of Li[NixMnyCo1-x-y]O2 cathodes, *Journal of Materials Chemistry A* 7(10) (2019) 5463-5474.
- [2] X. Fan, G. Hu, B. Zhang, X. Ou, J. Zhang, W. Zhao, H. Jia, L. Zou, P. Li, Y. Yang, Crack-free single-crystalline Ni-rich layered NCM cathode enable superior cycling performance of lithium-ion batteries, *Nano Energy* 70 (2020) 104450.
- [3] W. Li, S. Lee, A. Manthiram, High-Nickel NMA: A Cobalt-Free Alternative to NMC and NCA Cathodes for Lithium-Ion Batteries, *Advanced Materials* 32(33) (2020) 2002718.

- [4] N. Muralidharan, R. Essehli, R.P. Hermann, A. Parejiya, R. Amin, Y. Bai, Z. Du, I. Belharouak,  $\text{LiNi}_x\text{Fe}_y\text{Al}_z\text{O}_2$ , a new cobalt-free layered cathode material for advanced Li-ion batteries, *Journal of Power Sources* 471 (2020) 228389.
- [5] H. Li, M. Cormier, N. Zhang, J. Inglis, J. Li, J.R. Dahn, Is Cobalt Needed in Ni-Rich Positive Electrode Materials for Lithium Ion Batteries?, *Journal of The Electrochemical Society* 166(4) (2019) A429-A439.
- [6] Z. Cui, Q. Xie, A. Manthiram, A Cobalt- and Manganese-Free High-Nickel Layered Oxide Cathode for Long-Life, Safer Lithium-Ion Batteries, *Advanced Energy Materials* 11(41) (2021) 2102421.
- [7] L. Mu, R. Zhang, W.H. Kan, Y. Zhang, L. Li, C. Kuai, B. Zydlewski, M.M. Rahman, C.-J. Sun, S. Sainio, M. Avdeev, D. Nordlund, H.L. Xin, F. Lin, Dopant Distribution in Co-Free High-Energy Layered Cathode Materials, *Chemistry of Materials* 31(23) (2019) 9769-9776.
- [8] T. Wu, G. Wang, B. Liu, Q. Huang, Y. Su, F. Wu, R.M. Kelly, The role of Cu impurity on the structure and electrochemical performance of Ni-rich cathode material for lithium-ion batteries, *Journal of Power Sources* 494 (2021) 229774.
- [9] S.-B. Lee, N.-Y. Park, G.-T. Park, U.-H. Kim, S.-J. Sohn, M.-S. Kang, R.M. Ribas, R.S. Monteiro, Y.-K. Sun, Doping Strategy in Developing Ni-Rich Cathodes for High-Performance Lithium-Ion Batteries, *ACS Energy Letters* 9(2) (2024) 740-747.
- [10] Z. Zhang, B. Hong, M. Yi, X. Fan, Z. Zhang, X. Huang, Y. Lai, In situ co-doping strategy for achieving long-term cycle stability of single-crystal Ni-rich cathodes at high voltage, *Chemical Engineering Journal* 445 (2022) 136825.
- [11] J. Li, H. Yang, Q. Deng, W. Li, Q. Zhang, Z. Zhang, Y. Chu, C. Yang, Stabilizing Ni-rich Single-crystalline  $\text{LiNi}_{0.83}\text{Co}_{0.07}\text{Mn}_{0.10}\text{O}_2$  Cathodes using Ce/Gd Co-doped High-entropy Composite Surfaces, *Angewandte Chemie International Edition* 63(10) (2024) e202318042.
- [12] L. Shen, F. Du, Q. Zhou, T. Xu, Z. Fan, Y. Wen, J. Wang, J. Wu, J. Zheng, Cobalt-free nickel-rich cathode materials based on Al/Mg co-doping of  $\text{LiNiO}_2$  for lithium ion battery, *Journal of Colloid and Interface Science* 638 (2023) 281-290.
